# Supplementary material for: Improving formaldehyde consumption drives methanol assimilation in engineered E. coli
Source: PubMed Central journal article supplement (PMC6008399; doi:10.1038/s41467-018-04795-4), 2018-06-19
Supplement: 41467_2018_4795_MOESM2_ESM.pdf [file 41467_2018_4795_MOESM2_ESM.pdf]

### **Descriptions of Additional Supplementary Files**

File Name: Supplementary Dataset 1

Description: Supplemental Dataset 1 contains the full simulated formaldehyde time course data that was used to generate Figure 6b.
